# Supplementary material for: Sample-sparing multiplexed antibody Fc biomarker discovery using a reconfigurable integrated microfluidic platform
Source: Royal Society of Chemistry journal article supplement (doi:10.1039/d5lc00042d), 2025-01-01
Supplement: d5lc00042d1.pdf [file d5lc00042d1.pdf]

| <b>Parameter Comparison For Three Assays To Perform Antigen-Specific Antibody Biomarker Discovery Against 8 Antigens, 4 probes For 14 Samples With 3 Repeats</b> |                                   |                      |                                    |
|------------------------------------------------------------------------------------------------------------------------------------------------------------------|-----------------------------------|----------------------|------------------------------------|
|                                                                                                                                                                  | LC-MS                             | Traditional ELISA    | μMAP                               |
| Multiplexed (target antigen & probe)                                                                                                                             | No                                | No                   | Yes                                |
| Glycosylation Measurement                                                                                                                                        | Yes                               | No                   | Yes                                |
| How Is Glycosylation Quantified?                                                                                                                                 | Direct detection by Mass Spectrum | N/A                  | Indirectly by lectin probe binding |
| Samples per assay run                                                                                                                                            | 1                                 | 1/plate              | 14/slide                           |
| Total Serum volume before concentration/dilution (μl)                                                                                                            | 4800-12000                        | 48 (diluted to 4800) | 0.15 (diluted to 15)               |
| Runtime since sample addition for one assay (hr)                                                                                                                 | 6                                 | 2.5                  | 2                                  |
| Total Assay Runtime to Test All Samples (hr)                                                                                                                     | 336                               | 35                   | <3                                 |
| Equipment Cost (k\$)                                                                                                                                             | 200-889                           | 25                   | 253                                |
| Assay Unit Cost (\$)                                                                                                                                             | 250                               | 3                    | 10                                 |
| Dynamic Range (log)                                                                                                                                              | 4-6 <sup>1</sup>                  | 2-3 <sup>2</sup>     | >3                                 |

Table 1: Comparison between existing methods and current work.

| % S Label of Sialic Acid-Modified Glycoengineered Serum Sample | Actual Sialic Acid % Among Glycans In The Serum Sample |
|----------------------------------------------------------------|--------------------------------------------------------|
| 100                                                            | 9.3258315                                              |
| 75                                                             | 7.8632774                                              |
| 50                                                             | 6.0212389                                              |
| 25                                                             | 3.5244399                                              |
| 0                                                              | 2.6262206                                              |

Table S2: Comparison between numerical value of % S label of sialic acid-modified glycoengineered serum sample and actual sialic acid % among glycans in the serum sample measured by LC/MS. Pearson correlation between the numeric values equals 0.9922, suggesting the %S label we assign is linearly correlated with actual percentage of sialic acid.

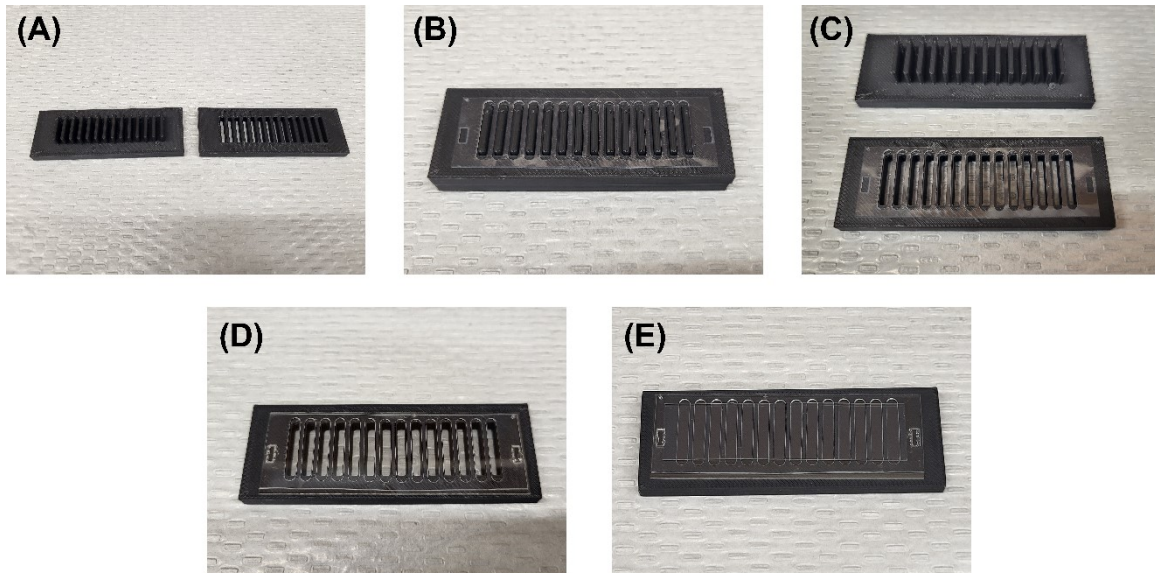

Figure S1: Assembly process of the  $\mu$ MAP when used for sample incubation: A. Two pieces of sample alignment block. B. Stack alignment blocks and PDMS for sample channel together. C. Remove bottom block while keeping the PDMS on top block. D. Press the glass slide on the top of the block, with rectangular marks aligned. E. Put the PDMS for top cover layer on the top of the sample channel layer.

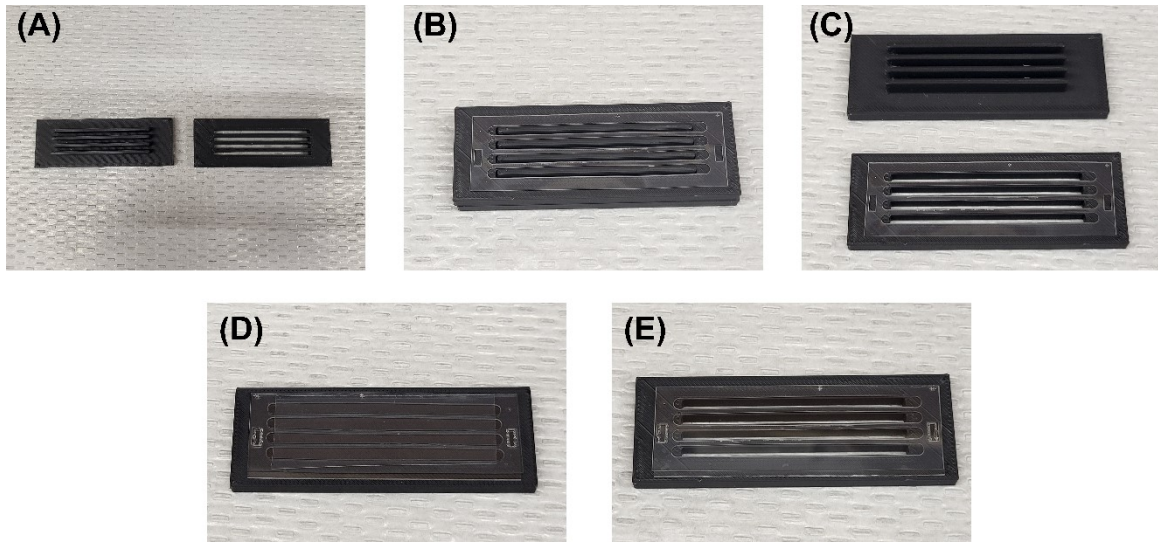

Figure S2: Assembly process of the  $\mu$ MAP when used for probe incubation: A. Two pieces of probe alignment block. B. Stack alignment blocks and PDMS for probe channel together. C. Remove bottom block while keeping the PDMS on top block. D. Press the glass slide on the top of the block, with rectangular marks aligned. E. Put the PDMS for top cover layer on the top of the probe channel layer.

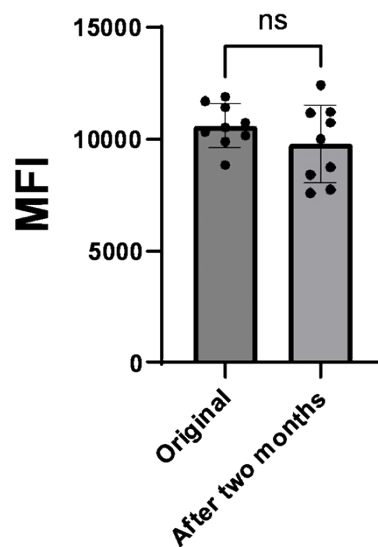

Figure S3: Stability of the microarray slide using the Protein A/G assay shown in Figure 4.A. A slide with protein A/G was stored for two months before running the same A/G assay (N = 9). MFI was compared using an unpaired T test with P = 0.22.

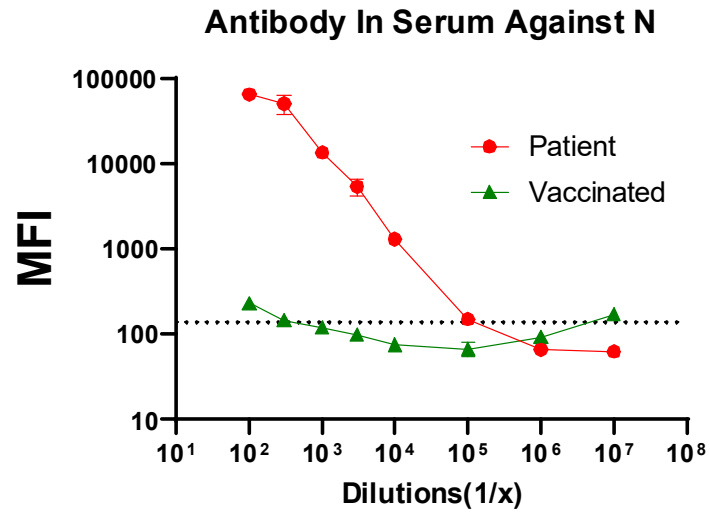

Figure S4: MFI of Sars-CoV-2 nucleocapsid protein specific IgG in individual samples of Sars-CoV-2 patient, and vaccinated individuals with a repeat of N = 2. The dynamic range of 1:300 to 1:10<sup>5</sup> dilution is considered reliable.

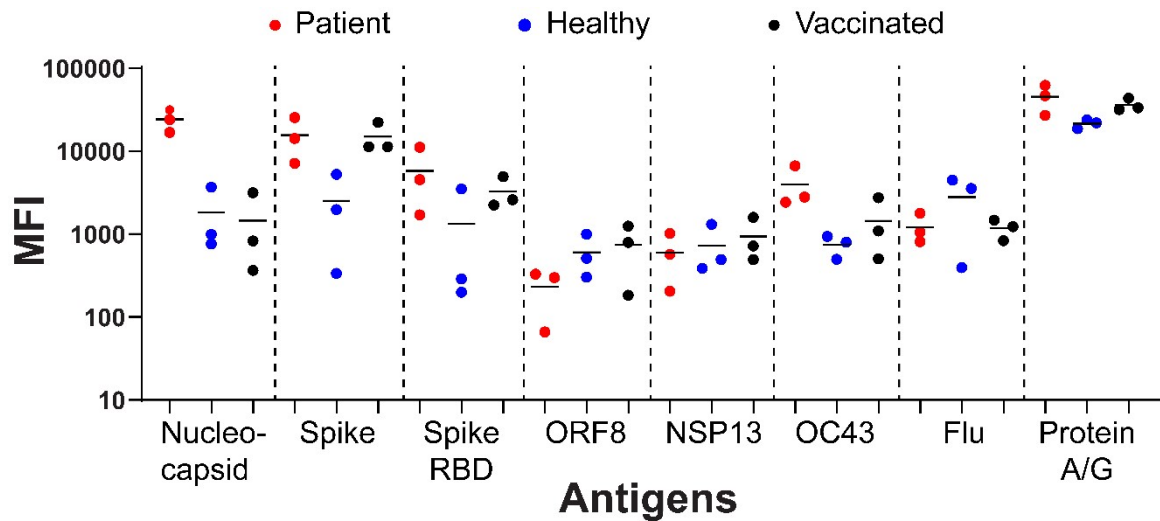

Figure S5: MFI of antigen specific IgG in individual samples of Sars-Cov-2 patient, pre pandemic healthy individuals and vaccinated individuals. 6 Sars-Cov-2 antigens and 2 controls were selected. Each dot represents one individual with a repeat of N = 2.

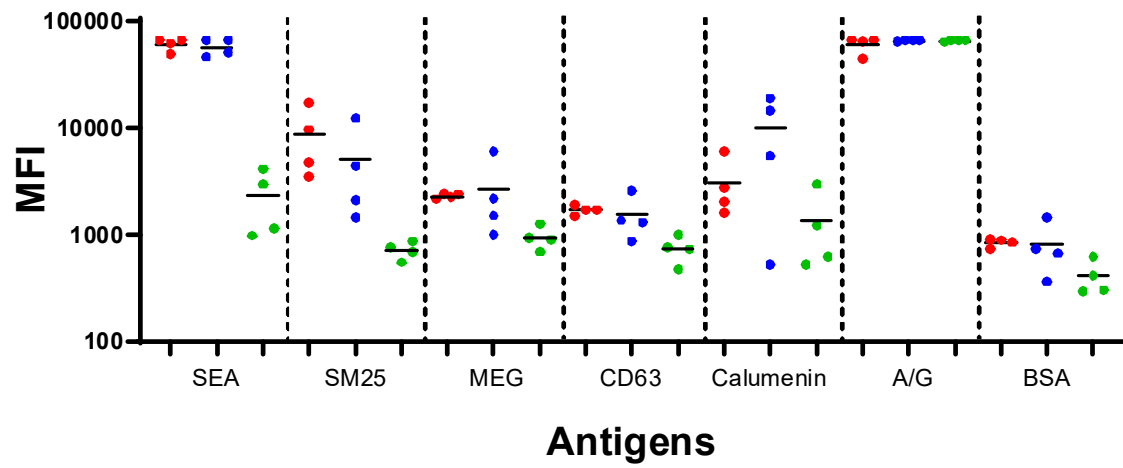

Figure S6: MFI of 5 Schistosomiasis antigen specific IgG in individual samples of SEA+Egg+ (current infection, red), SEA+Egg- (past infection, blue) and SEA-Egg- (healthy, green) from Schistosomiasis-active regions in Brazil. Each dot represents one individual with a repeat of N = 3, except for BSA, whose N = 2.

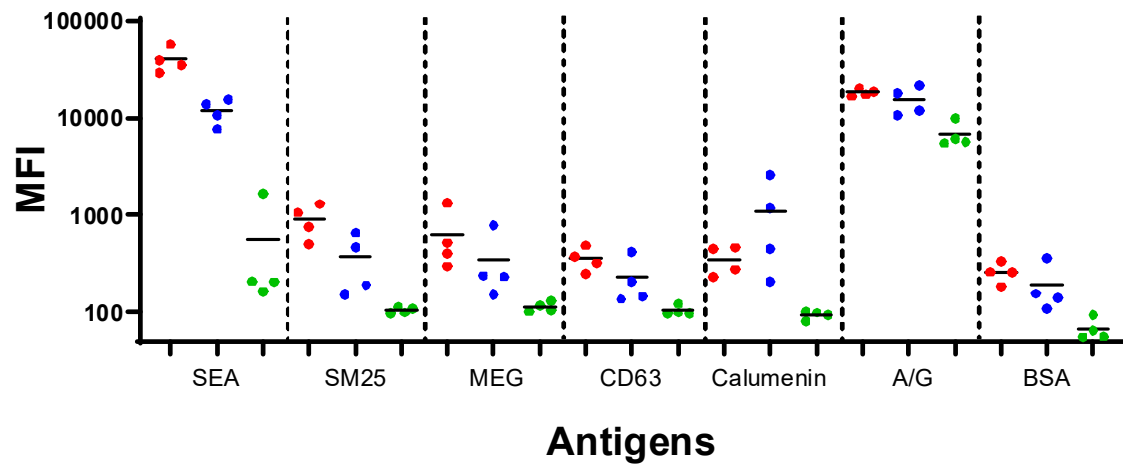

Figure S7: MFI of 5 Schistosomiasis antigen specific IgG4 in individual samples of SEA+Egg+ (current infection, red), SEA+Egg- (past infection, blue) and SEA-Egg- (healthy, green) from Schistosomiasis-active regions in Brazil. Each dot represents one individual with a repeat of N = 3, except for BSA, whose N = 2.

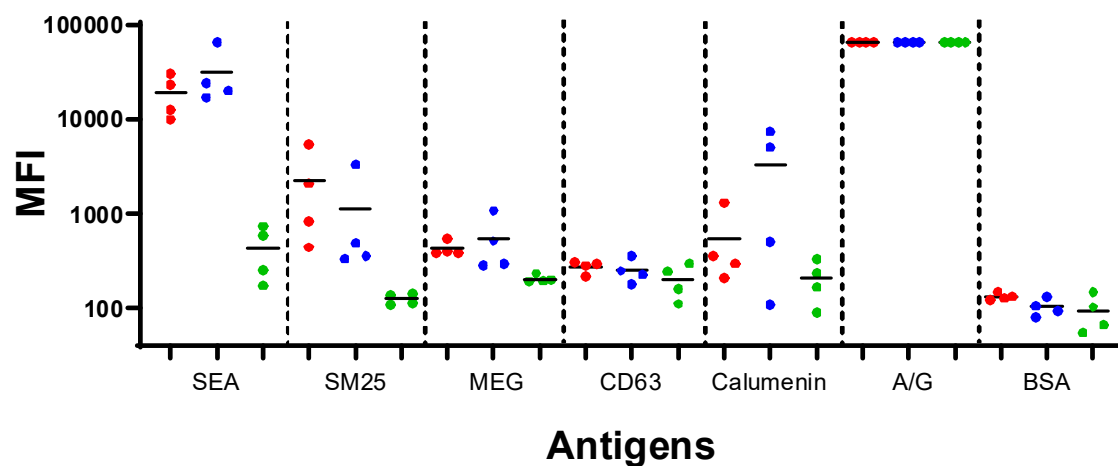

Figure S8: MFI of 5 Schistosomiasis antigen specific FcR2A binding in individual samples of SEA+Egg+ (current infection, red), SEA+Egg- (past infection, blue) and SEA-Egg- (healthy, green) from Schistosomiasis-active regions in Brazil. Each dot represents one individual with a repeat of N = 3, except for BSA, whose N = 2.

#### References

1. T. E. Angel, U. K. Aryal, S. M. Hengel, E. S. Baker, R. T. Kelly, E. W. Robinson and R. D. Smith, *Chem Soc Rev*, 2012, **41**, 3912-3928.
2. A. Online, SARS-CoV-2 / COVID-19 ELISA Kits, <https://www.antibodies-online.com/areas/infectious-disease/covid-19/sars-cov-2-elisa-kits/?srsId=AfmBOorVASvAKd3vtdgTOXQmxkoWa-b4gsaqUICswmfBTrMBsZI2WUK>, (accessed 02/18, 2025).
